# Supplementary material for: Response of pumas (Puma concolor) to migration of their primary prey in Patagonia
Source: PubMed Central journal article supplement (PMC5718558; doi:10.1371/journal.pone.0188877), 2017-12-06

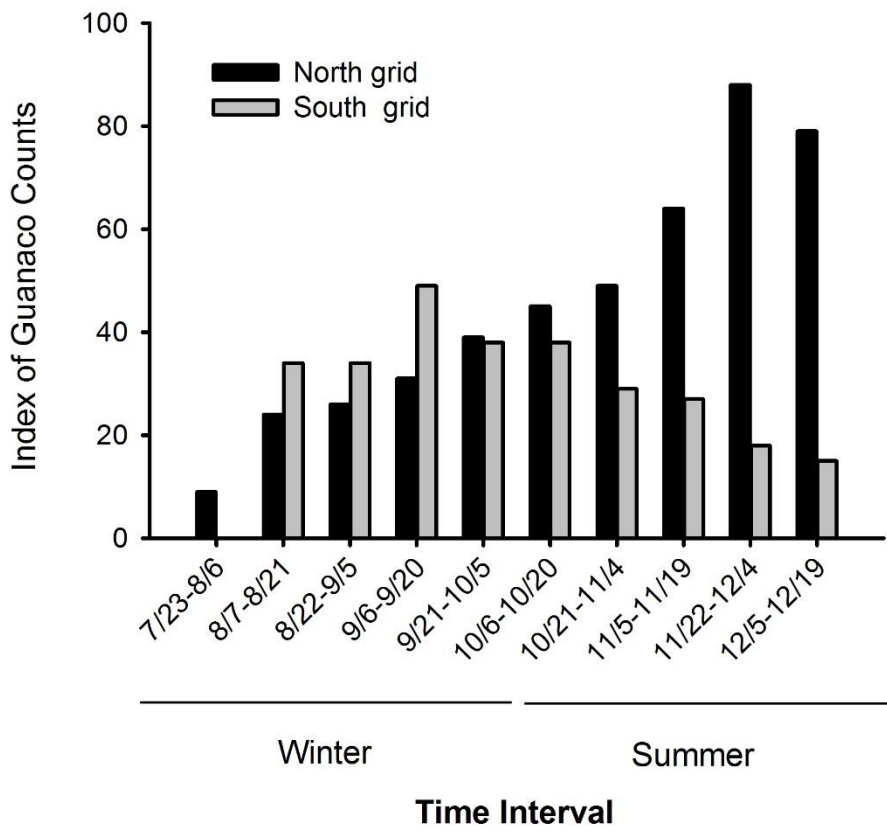

Supplement: pone.0188877.s001.pdf [file pone.0188877.s001.pdf]
