# Supplementary material for: Response of pumas (Puma concolor) to migration of their primary prey in Patagonia
Source: PubMed Central journal article supplement (PMC5718558; doi:10.1371/journal.pone.0188877), 2017-12-06
Supplement: pone.0188877.s003.pdf [file pone.0188877.s003.pdf]

| Model                                                   | AICc | $\Delta$ AICc | $\lambda_0$ | $\sigma$ | K  |
|---------------------------------------------------------|------|---------------|-------------|----------|----|
| D(session) $\lambda_0(\text{site})$ , $\sigma(\cdot)$   | 1432 | 0             | 0.019       | 754      | 7  |
| D(session) $\lambda_0(\text{t})$ , $\sigma(\cdot)$      | 1488 | 56            | 0.016       | 805      | 16 |
| D(session) $\lambda_0(\cdot)$ , $\sigma(\cdot)$         | 1512 | 80            | 0.027       | 1273     | 6  |
| D(session) $\lambda_0(\text{k})$ , $\sigma(\cdot)$      | 1647 | 215           | 0.000008    | 1935     | 7  |
| D(session) $\lambda_0(\text{b})$ , $\sigma(\cdot)$      | 1883 | 451           | 0.006       | 773      | 7  |
| D( $\cdot$ ) $\lambda_0(\text{site})$ , $\sigma(\cdot)$ | 1532 | 0             | 0.017       | 771      | 4  |
| D( $\cdot$ ) $\lambda_0(\cdot)$ , $\sigma(\cdot)$       | 1551 | 19            | 0.054       | 727      | 3  |
| D( $\cdot$ ) $\lambda_0(\text{t})$ , $\sigma(\cdot)$    | 1585 | 53            | 0.016       | 838      | 13 |
| D( $\cdot$ ) $\lambda_0(\text{b})$ , $\sigma(\cdot)$    | 1934 | 402           | 0.007       | 772      | 4  |
| D( $\cdot$ ) $\lambda_0(\text{k})$ , $\sigma(\cdot)$    | 2196 | 664           | 0.000007    | 1713     | 4  |
